# Supplementary material for: Transcriptional signatures of participant-derived neural progenitor cells and neurons implicate altered Wnt signaling in Phelan-McDermid syndrome and autism
Source: PubMed Central journal article supplement (PMC7304190; doi:10.1186/s13229-020-00355-0), 2020-06-19

A

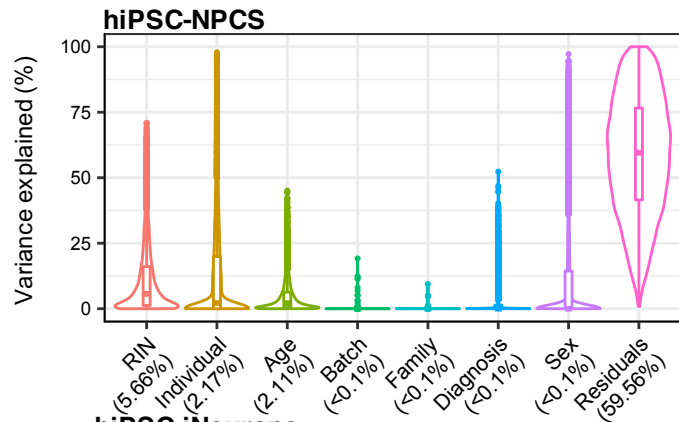

B

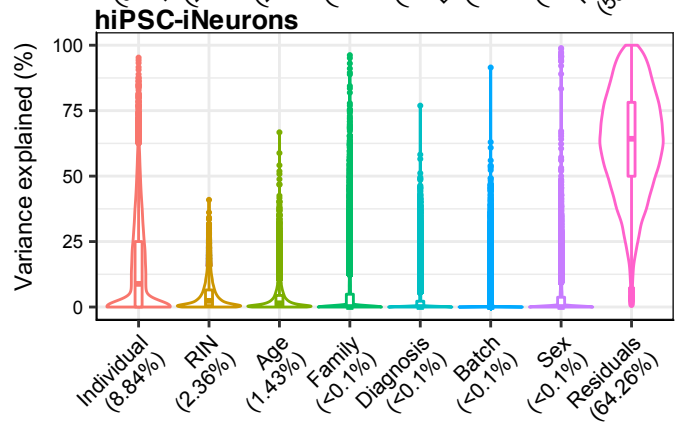

C

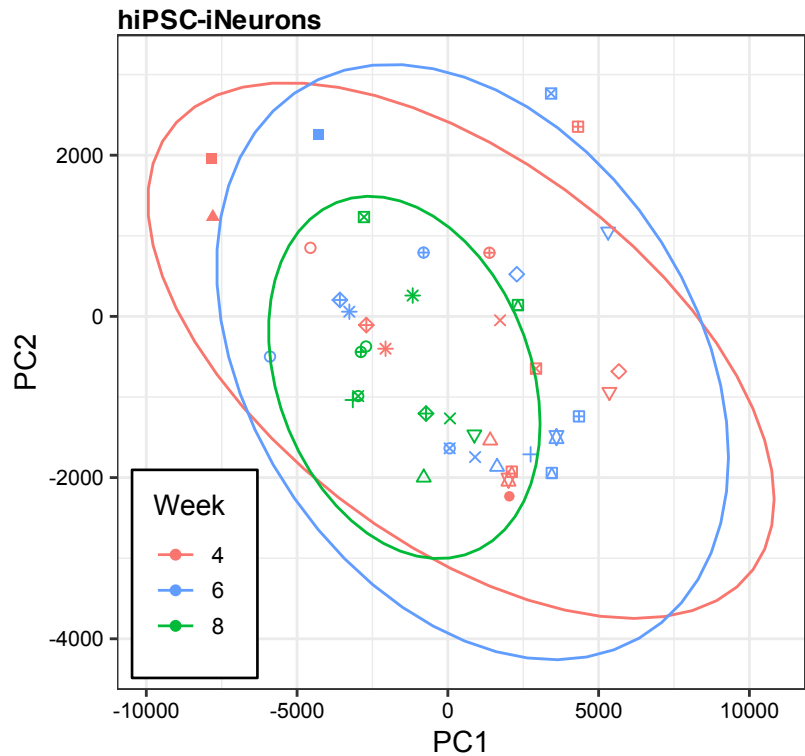

Supplement: 13229_2020_355_MOESM5_ESM.pdf [file 13229_2020_355_MOESM5_ESM.pdf]
