# Supplementary material for: Transcriptional signatures of participant-derived neural progenitor cells and neurons implicate altered Wnt signaling in Phelan-McDermid syndrome and autism
Source: PubMed Central journal article supplement (PMC7304190; doi:10.1186/s13229-020-00355-0), 2020-06-19
Supplement: 13229_2020_355_MOESM12_ESM.pdf [file 13229_2020_355_MOESM12_ESM.pdf]

A

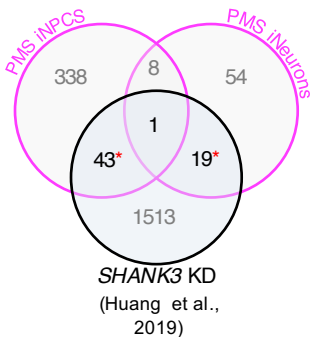

B

### Enrichment based on overlapping features with *SHANK3* KD

| Gene set name                           | P-value     | Adj. P-value |
|-----------------------------------------|-------------|--------------|
| epithelial_cell_differentiation         | 9.56E-07    | 0.0100       |
| cell_migration                          | 2.98E-06    | 0.0116       |
| canonical_Wnt_signaling_pathway         | 3.32E-06    | 0.0116       |
| canonical_Wnt_signaling_pathway         | 6.78E-06    | 0.0178       |
| endoplasmic_reticulum_lumen             | 6.73E-05    | 0.0191       |
| smooth_endoplasmic_reticulum_lumen      | 6.73E-05    | 0.0191       |
| cortical_endoplasmic_reticulum_lumen    | 7.31E-05    | 0.0191       |
| perinuclear_endoplasmic_reticulum_lumen | 7.77E-05    | 0.0191       |
| rough_endoplasmic_reticulum_lumen       | 9.48E-05    | 0.0191       |
| sarcoplasmic_reticulum_lumen            | 0.000104437 | 0.0191       |

C

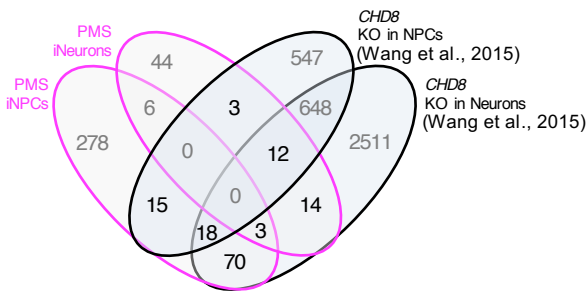

D

### Enrichment based on overlapping features with *CHD8* KO

| Gene set name                                                       | P-value     | Adj. P-value |
|---------------------------------------------------------------------|-------------|--------------|
| galactosaminoglycan/glycosaminoglycan/mucopolysaccharide metabolism | 1.05E-08    | 2.77E-05     |
| Golgi_lumen                                                         | 1.52E-06    | 0.0016       |
| trans-Golgi_network_transport_vesicle_lumen                         | 2.92E-06    | 0.0016       |
| multicellular_organism_development                                  | 2.04E-06    | 0.0019       |
| lysosomal_matrix                                                    | 8.16E-06    | 0.0022       |
| cortical_endoplasmic_reticulum_lumen                                | 2.44E-05    | 0.0032       |
| perinuclear_endoplasmic_reticulum_lumen                             | 2.66E-05    | 0.0032       |
| endolysosome_lumen                                                  | 2.25E-05    | 0.0032       |
| proteinaceous_extracellular_matrix                                  | 0.000205759 | 0.0188       |
| SMAD_protein_complex                                                | 0.000885591 | 0.0495       |
| canonical_Wnt_signaling_pathway                                     | 0.000205759 | 0.0544       |

E

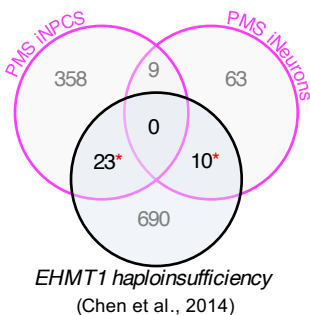

F

### Enrichment based on overlapping features with *EHTM1* haploinsufficiency

| Gene set name                                                       | P-value  | Adj. P-value |
|---------------------------------------------------------------------|----------|--------------|
| Golgi_lumen                                                         | 9.77E-06 | 0.00770      |
| trans-Golgi_network_transport_vesicle_lumen                         | 1.43E-05 | 0.0077       |
| hyaluronic_acid_binding                                             | 3.10E-06 | 0.0106       |
| galactosaminoglycan/glycosaminoglycan/mucopolysaccharide metabolism | 7.58E-06 | 0.0197       |
| biofilm_matrix_organization                                         | 4.32E-05 | 0.0292       |
| cellulose_microfibril_organization                                  | 4.32E-05 | 0.0292       |
| extracellular_matrix_organization                                   | 4.32E-05 | 0.0292       |
| basement_membrane_organization                                      | 4.44E-05 | 0.0292       |
| fibronectin_fibril_organization                                     | 4.44E-05 | 0.0292       |
| extracellular_matrix_assembly                                       | 5.07E-05 | 0.0296       |
| collagen_fibril_organization                                        | 5.77E-05 | 0.0319       |
| central_nervous_system_neuron_differentiation                       | 6.53E-05 | 0.0343       |
| chondroitin_sulfate_biosynthetic_process                            | 7.31E-05 | 0.0366       |

G

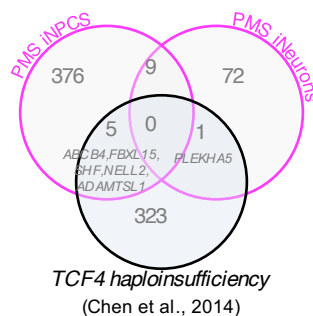

H

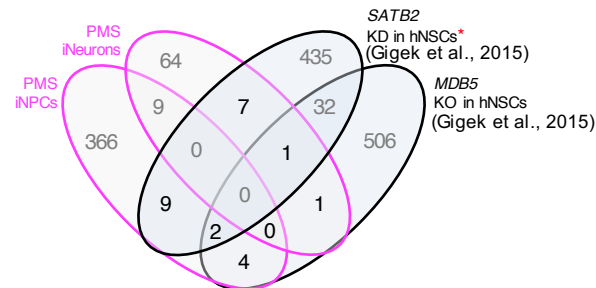

I

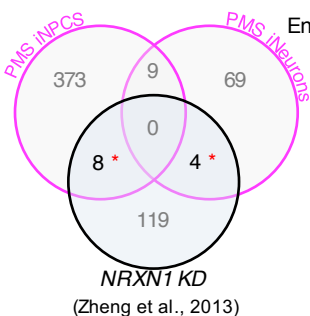

J

### Enrichment based on overlapping features with *NRXN1* KD

| Gene set term                                      | P-value | Adj. P-value |
|----------------------------------------------------|---------|--------------|
| canonical_Wnt_signaling_pathway                    | 0.0003  | 0.4296       |
| beta-catenin_destruction_complex_disassembly       | 0.0005  | 0.4296       |
| receptor_internalization_involved_in_Wnt_signaling | 0.0011  | 0.756        |
| Golgi_lumen                                        | 0.0014  | 0.7816       |
| trans-Golgi_network_transport_vesicle_lumen        | 0.0017  | 0.7816       |
| L-glutamate_import                                 | 0.0034  | 1            |
| central_nervous_system_neuron_differentiation      | 0.0037  | 1            |
| L-glutamate_import                                 | 0.0046  | 1            |
| ion_channel_complex                                | 0.0052  | 1            |

K

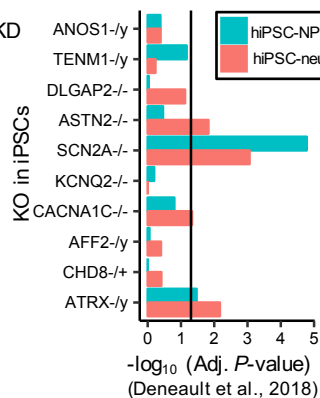

L

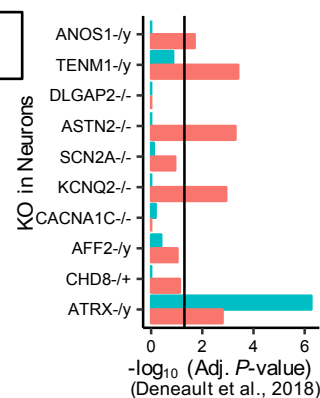

M

### Enrichment based on overlapping features with *ATRX-ly*

| Gene set name                                     | P-value | Adj. P-value |
|---------------------------------------------------|---------|--------------|
| cell_migration_involved_in_sprouting_angiogenesis | 0.0001  | 0.6967       |
| cerebellar_granule_cell_differentiation           | 0.0002  | 0.4866       |
| positive_regulation_of_Wnt_signaling_pathway      | 0.0002  | 0.8067       |
| glutamate_receptor_activity                       | 0.0003  | 0.4866       |
| contractile_vacuole_discharge                     | 0.0004  | 0.8067       |
| regulated_exocytosis                              | 0.0004  | 0.4866       |
| ionotropic_glutamate_receptor_activity            | 0.0005  | 0.4866       |
| endocytic_vesicle_membrane                        | 0.0006  | 0.0904       |
| synapse_assembly                                  | 0.0009  | 0.6358       |
| calcium_ion_regulated_exocytosis                  | 0.0011  | 0.8067       |
| NMDA_glutamate_receptor_activity                  | 0.0012  | 0.8067       |
